# Supplementary material for: Structural basis for LeishIF4E-1 modulation by an interacting protein in the human parasite Leishmania major
Source: PubMed Central journal article supplement — Nucleic Acids Res. 2018 Mar 19;46(7):3791–801. doi: 10.1093/nar/gky194 (PMC5909430; doi:10.1093/nar/gky194), 2018-03-19
Supplement: gky194_supp.pdf [file gky194_supp.pdf]

## **SUPPLEMENTARY DATA**

### **MATERIAL AND METHODS**

#### **Translation Assay**

We performed translational assays as previously described in (1), with the following modifications. We cultured HEK293T cells in Dulbecco's Modified Eagle's Medium (DMEM, Lonza), supplemented with 10% FBS (Thermo Scientific) and penicillin/streptomycin (Lonza) to 70-80% confluence in 6-well plates. We transfected 500 ng of a bicistronic reporter construct pFL-EMCV-IRES-RL containing the firefly luciferase followed by the EMCV IRES and the renilla luciferase. Along the dual luciferase reporter, we co-transfected 500 ng of the pcDNA3-eGFP plasmid, or the plasmids encoding 4E-IP1 fragments (pcDNA3-Leish4E-IP1-eGFP) or mouse 4E-BP1 fragment (pcDNA3-4E-BP-eGFP) using polyethyleneimine (PEI). Twenty-four hours post-transfection, we lysed and measured the luciferase activity with a dual luciferase reporter assay system (Promega) using an EnVision 1 plate reader.

#### **Yeast two-hybrid assay**

We performed yeast two-hybrid assays using the commercial GAL4 Two-Hybrid Phagemid Vector Kit (Stratagene) according to the manufacturer's instructions. We cloned the open reading frame of IF4E-1 into the GAL4-binding domain vector (pBD) using EcoRI and Sall sites. We cloned the open reading frame of Leish4E-IP1 into the GAL4 activation domain vector (pAD) through BamHI and XbaI sites. We generated point mutations in LeishIF4E-1 and Leish4E-IP1 by site directed mutagenesis. We co-transformed the yeast strain YRG-2 (Mata ura352 his3-200 ade2-101 lys2-801 trp1-901 leu2-3 112 gal4-542 gal80-538 LYS2::UASGAL1-TATA GAL1-HIS3 URA3::UASGAL4 17mers(x3) TATACYC1-lacZ) with the specific pAD and pBD constructs. We cultured the yeast transformants in Liquid SD-2 (-Trp/-Leu) medium at 30 °C overnight, diluted to a final concentration of O.D<sub>600</sub> of 0.15 and continued growth to an O.D<sub>600</sub> of 0.5. We then spotted yeast on SD-2 (-Trp/-Leu) and SD-3 (-Trp/-Leu/-His) plates and grew them at 30 °C.

# Figure S1

A

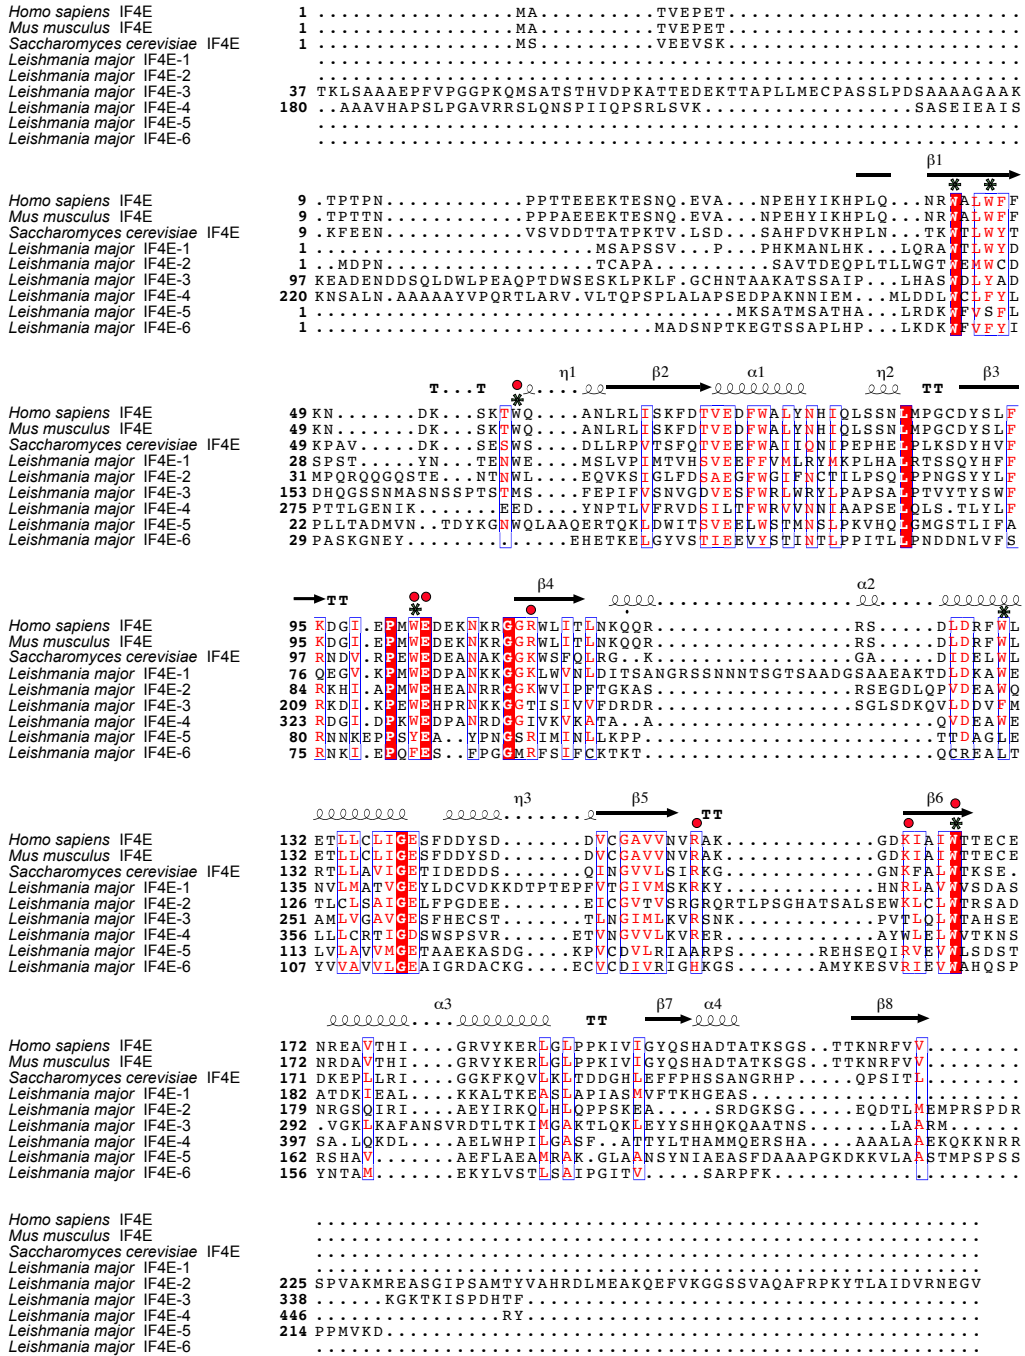

**B**

*Drosophila melanogaster* Cup 301 KPGSLRAPKAVRPTTAPVVSSKPVKS**Y**TRSR**LMD**IRNGMFPNALMHRSKESFVMPRIATCD  
*Leishmania major* 4E-IP1 1 . . . . .MPSVRTM**Y**TR**FELL**R**IAT**..LASAMDLGPE. . . . .VLRKFFD  
YXXXXLΦ

*Drosophila melanogaster* Cup 361 DIELEGLRLR. . . . .RMNIWRTSDGT. . . . .RFRTRSTTANLNMNNNNECMPAFFKNKKNPN  
*Leishmania major* 4E-IP1 35 VIEVAEPVPTPKRRDAESNFKGSVFTDNFSTSTTITNLGPNGGGNSGGKGGHNS. . . . .G

*Drosophila melanogaster* Cup 414 **I**S**D**ES**I**I**Q**S**Q**P**P**Q**P**Q**T**EF**Q**D**P**A**I**V**N**Q**R**R**I**G**S**G**R**L**N**H**S**K. . . . .W**F**Y**N**D. . . . .E  
*Leishmania major* 4E-IP1 90 **M**.**N**GGGSS**S****N**H**P**GSST. . . . .P**V**Y**G**SGGG**R**G. **G**DNRRGGGGGGG**G**NG**R**DDSSNSNSVR**Q**S  
*Homo sapiens* 4E-BP1 1 **M**.**S**GGSS**S****S****Q****T****P**SRAIPATRRV**V**LG**D**GV**Q**L**P****P****G**DY**S**TT. . . . .P**G****F****T**. . . . .

*Drosophila melanogaster* Cup 459 DYHS**Y**HNGKSQHMEEVNSKNSKNMTVLQ**F**D**N**GEISS**Q**P**Q**RR**P****N**TPVMGMSINRSEN. . . . .D  
*Leishmania major* 4E-IP1 144 GYDR**F**AP**P**EGR. . . . .FNR. . . . .GNRN**Q**ET**F**E**G**IE**Y**EL**R****Q**SAL**Q**KKRVAETMEREDRKGE  
*Homo sapiens* 4E-BP1 42 . . . . .L**F**ST**T**PG. . . . .G. . . . .TR**I**I**Y**D**R**K**F**L**M**E**C**R**N**SPV**T**KT. . . . .  
YXXXXLΦ

*Drosophila melanogaster* Cup 517 TL. . . . .HSNESSEDLSTRANENYKRVMSGFLVSVKPKSRDVEDRHHRRYRN. . . . .Q  
*Leishmania major* 4E-IP1 196 NLRQALEK**F**Q**E**GNDAEAAEA**E**KETDEIERLLAGITIVDDAPKAVVRSRFFSAQPTATS  
*Homo sapiens* 4E-BP1 70 . . . . .

*Drosophila melanogaster* Cup 565 NEEPEWFSCGP.TSRLDTIELCGFDEDE. . . . .EKMLKEGKNHGLGETERET  
*Leishmania major* 4E-IP1 256 AEHPAT**T**Q**P**SP**P**PP**Q**AST. . . . .T**L**S**F**GAPASS**I**APATTGT**P**QASV**L**PT. . . . .PANS**G**T**Q**GYARG**P**  
*Homo sapiens* 4E-BP1 70 . . . . .

*Drosophila melanogaster* Cup 612 SKQKMDHKYK**W**THA**E**PMGRSKYMPKHDTNNNNHVENMNNVMATEHQ**Q**Q**K**EE**KR****P****G**SGRS**F**  
*Leishmania major* 4E-IP1 313 WSSMKSDSNL**W**STAP**S**MAS**AL**K. . . . .QSL**Q**H**S**L**P****P**. . . . .  
*Homo sapiens* 4E-BP1 70 . . . . .

*Drosophila melanogaster* Cup 672 QFDKFNQSQNY**E**SSSYVN**H**Q**Q**PP**Q**T**Q**P**Q**MQ**Q**SNTNTNNSKFMSFFANE. . . . .G  
*Leishmania major* 4E-IP1 344 . . . . .A**D**AS**P**SV. **P**IK**P**Q**P**AS**Q**Q**S**Q**P**SS**C**PAS**T**SH**Q**AT**S**MGAAAANASAN**S**T**G**  
*Homo sapiens* 4E-BP1 73 . . . . .R**D**L. . . . .

*Drosophila melanogaster* Cup 724 NSSSSSLNEFFKQAI. . . . .NQGHGN. . . . .  
*Leishmania major* 4E-IP1 392 APSASGPAS**F**GV**P**APAPAS**P**APP**Q**SSV**L**GPANGHSSTNIATAMGAK**T**GVSSAA**Q**P**Q**AP  
*Homo sapiens* 4E-BP1 76 . . . . .P**T**IPGV**T**SP**S**DE**P**ME. . . . .

*Drosophila melanogaster* Cup 745 . . . . .N**P**EQPKSLGH**I**G**Q**M**P**S. . . . .VDQLEAK**W**RRNS**L**NNVGETANK**Q**T**D**N**F**  
*Leishmania major* 4E-IP1 452 PHTPP**Q**TPHHS**Q**S**Q**SR**P**APATA**I**KAA**P**RS**G**STGV**P**TGAWSA**A**D**L**ELL**L**KK**G**. . . . .  
*Homo sapiens* 4E-BP1 93 . . . . .A**S**Q**S**H**L**R**N**S**P**ED**K**RA. . . . .G**G**E**S**Q**F**E**M**D**I**. . . . .

*Drosophila melanogaster* Cup 787 QKLIGLSL. . . . .SAKPQS**Q**AVGYDAIS**N**FIM**Q**Q**Q**Y**Q**Q**Q**Q**Q**K**Q**H**L**I**I**Q**Q**Q**Q**H**T**  
*Leishmania major* 4E-IP1 505 ATMISSAPAPP**P**STAASATA**A**AP**K**T**Q**P**I**TAA**E**LES**M**L**M**Q**R**. . . . .

*Drosophila melanogaster* Cup 838 AFLASLQ**L**K**A**ILGRAD**T**Q**L**LL**L**RL**T**K**G**E. **I**SK**H**GL**L**V**Q**L**A**N. **P**RL**T**DM**D**RE**A**IT**A**V**L**Q**F****T**  
*Leishmania major* 4E-IP1 544 . . . . .AR**Q**GR**G**V**T**GN**G**M**S**T**V**PP**S**PP**Q**F**Q**. **P**PP**P**R**Q**AP**L**L**F**A

*Drosophila melanogaster* Cup 896 NTQ**Q**Q**Q**Q**H**. . . . .K**Q**L**D**ML**S**ST**V**IAS**Q**L**Q**N**L**H**N**L**A**I**V****Q**. . . . .**Q****T**  
*Leishmania major* 4E-IP1 580 N**P**SK**T**PP**M**P**A**NS**N**PT**S**AP**L**SS**P**Q**L**P**A**SM**K**MA**P**NG**A**ML**Q**PK**Q**PH**Q**Q**Q**PL**P**PP**P**PP**M**PS**Q**

*Drosophila melanogaster* Cup 933 LAAR**Q**Q**P**Q**H**NP**Q**T**Q**AP**H**Q**L**S**Q**ED**L**Q**A**HAN**V**IM. . . . .RNA**V**. . . . .  
*Leishmania major* 4E-IP1 640 M**P**AHS**Q**P**Q**S**Q**P**Q**P**Q**I**Q**P. **Q**I**Q**P**Q**H**Q**T**P**WM**A**MP**R**PP**Q**APP**A**P**Q**P**N**SG**S**PM**H**NT**P**PL**Q**

*Drosophila melanogaster* Cup 968 .MKRKIE**Q**TS**K**L**I**NG**G**AK. . . . .H**Q**A**Q**Q**Y**L**N**R**G**. . . . .**Q**Q**R**Q**A**RP**D**ANS**N**ALL  
*Leishmania major* 4E-IP1 699 P**L**AA**K**MP**Q**. **P**AP**M**MQ**N**L**Q**MP**M**Q**M**NA**Q**Q**Y**F**V**DP**A**Q**L**Q**R**V**Y**MT**G**Q**P**MM**F**RR**P**DP**G**T**V**FM**Q**A

*Drosophila melanogaster* Cup 1013 HALISGGNNH**A**SG**Y**PM**N**G**Q**P**Q**K**H**SN**L**R**F**GD**N**Q**F**Q**S**F**E**SN**Q**PH**F**AT**Q**Y**K**Q**Y**Q**Q**S**Q**Q  
*Leishmania major* 4E-IP1 758 H**P**M. . . . .P**Q**P**Q**Q**Q**APP**Q**Q**P**PF**N**PF**G**T**N**A**Q**FL. . . . .F**Q**Q**Q**Q**Q**

*Drosophila melanogaster* Cup 1073 H**P**H**Q**Q**P**Q**L**NS**L**H**Q**NN**A**GVNS**F**NK**A**Q**M**Q**A**Q**S**A**I**S**M**LP**N**SG**D**E**F**H 1117  
*Leishmania major* 4E-IP1 794 **Q**R**R**. . . . . 796

**C**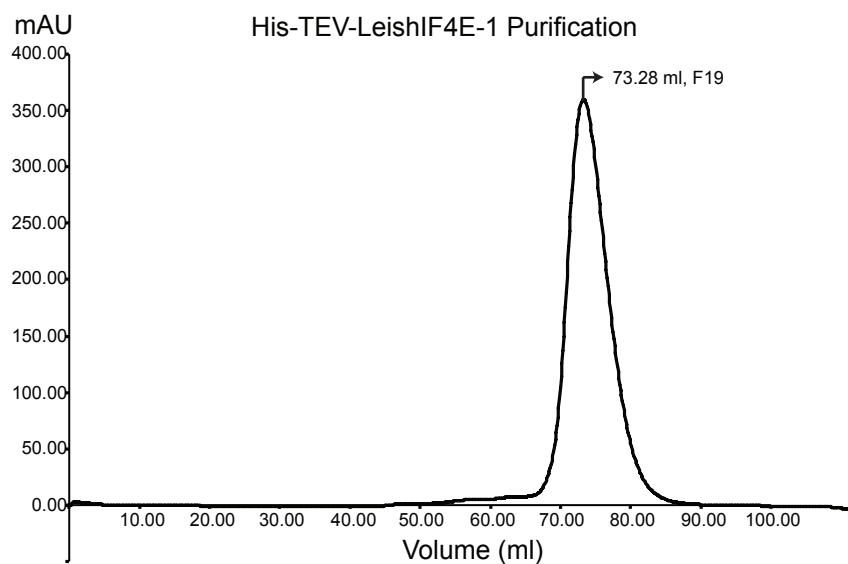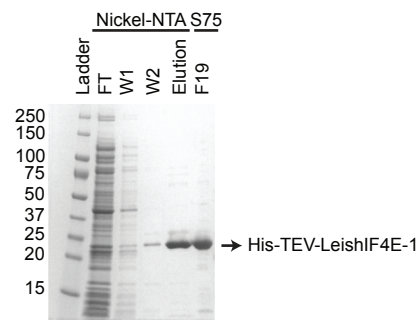**D**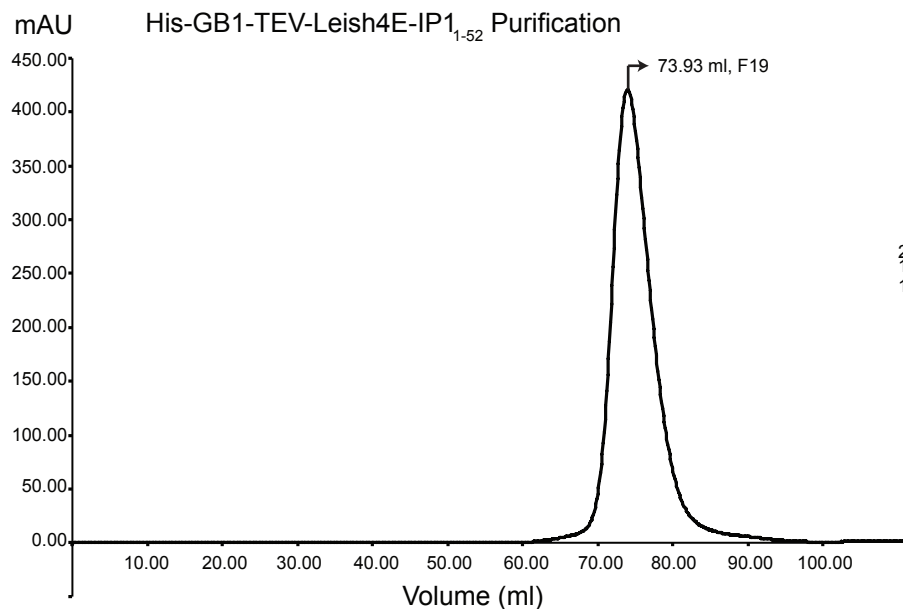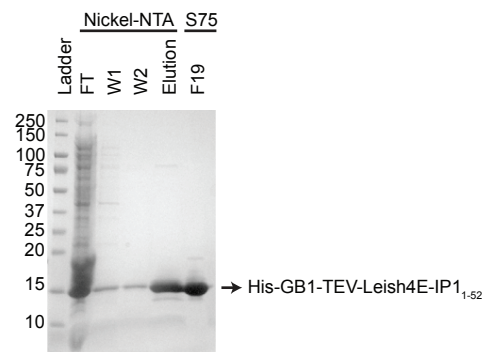**E**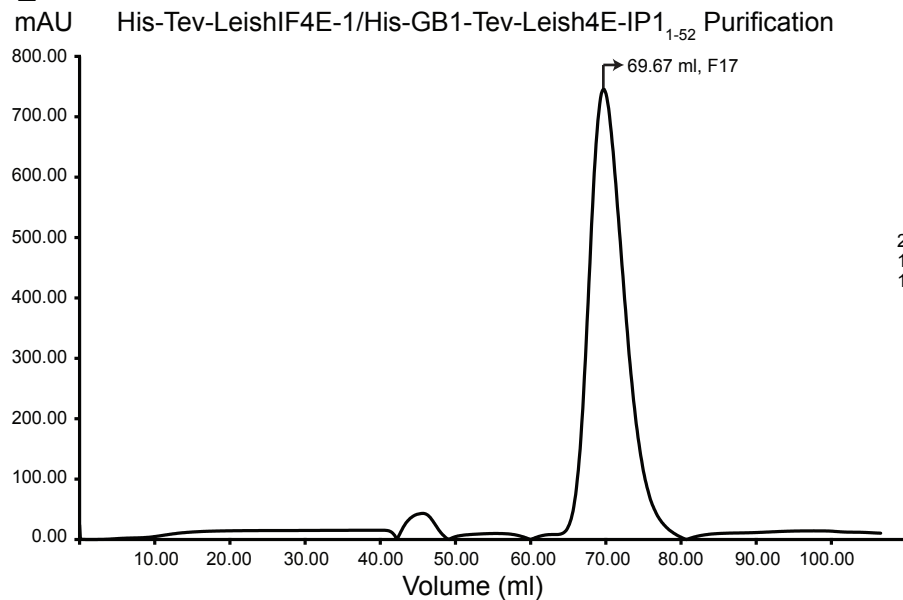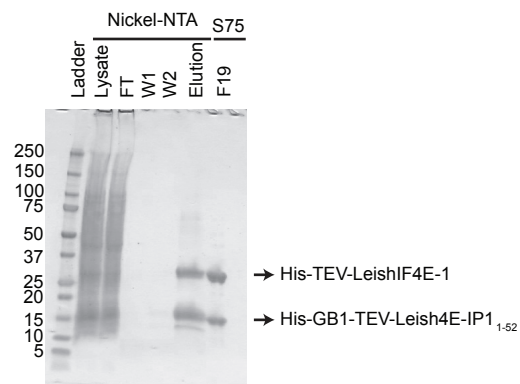

**Figure S1. Leish(IF4E-1/4E-IP1<sub>1-52</sub>) complex preparation, based on amino acid alignments and protein purification, related to Figure 1 and Figure 2**

**(A)** Sequence alignment of LeishIF4E cap binding proteins. Sequence alignment was generated using Clustal Omega (2, 3) and is displayed using ESPript3 (4). White letters over a red background correspond to identical residues while red letters over a white background show conservation. Secondary structure information for the aligned sequences are indicated ( $\alpha$ : alpha helices,  $\eta$ : 3<sub>10</sub>-helix,  $\beta$ : beta-strands, TT: strict  $\beta$ -turns) and are rendered, respectively, as medium and large squiggles, and as arrows. Stars indicate conserved tryptophans from LeishIF4E-1 when compared to mammalian IF4E, while residues from LeishIF4E-1 involved in binding the cap are indicated by red dots. UniProt accession no.: *Homo sapiens* P06730, *Mus musculus* P63073, *Saccharomyces cerevisiae* P07260, *Leishmania major* IF4E-1 E9ADE1, IF4E-2 Q4QD60, IF4E-3 Q4Q813, IF4E-4 Q4Q7R3 IF4E-5 Q4Q217, IF4E-6 Q4Q9G7.

**(B)** Sequence alignment of LeishIF4E binding proteins. Sequence alignment was generated using Clustal Omega and is displayed using ESPript3 as described in (A). The consensus binding motif (YXXXXL $\Phi$ ) is indicated and boxed in green for each IF4E binding protein. UniProt accession no.: *Drosophila melanogaster* Cup Q9VMA3, *Leishmania major* 4E-IP1 E9AFM3, *Homo sapiens* 4E-BP1 Q13541.

**(C)** Purification of recombinant His-TEV-LeishIF4E-1 protein. His-TEV-LeishIF4E-1 was expressed in bacterial cells and purified over a nickel-NTA agarose affinity column followed by gel filtration chromatography using a Superdex 75 HiLoad 16/60 column (left panel). Several fractions were analyzed by SDS-gel and stained by Coomassie along the purification steps (right panel). The band corresponding to LeishIF4E-1 is indicated by an arrow. For nickel-NTA purification (nickel-NTA): FT: flow-through, W1: first wash, W2: second wash and Elution. For Superdex 75 purification (S75): F19: fraction 19.

**(D)** Purification of recombinant His-GB1-TEV-Leish4E-IP1<sub>1-52</sub>. The purification scheme is as described in (C). The band corresponding to Leish4E-IP1 is indicated by an arrow.

**(E)** Purification of a recombinant Leish(IF4E-1/4E-IP1<sub>1-52</sub>) complex. Both proteins were expressed in bacterial cells and pellets were mixed before purification over a nickel-NTA agarose affinity column. Proteins were further purified by gel filtration chromatography using a Superdex 75 HiLoad 16/60 column and fractions were analyzed by SDS-gel and stained by Coomassie along the purification steps, as described in (C). The bands corresponding to LeishIF4E-1 and Leish4E-IP1 within the complex are indicated by an arrow.

# Figure S2

**A**  $^{15}\text{N}^{13}\text{C}$ -LeishIF4E-1

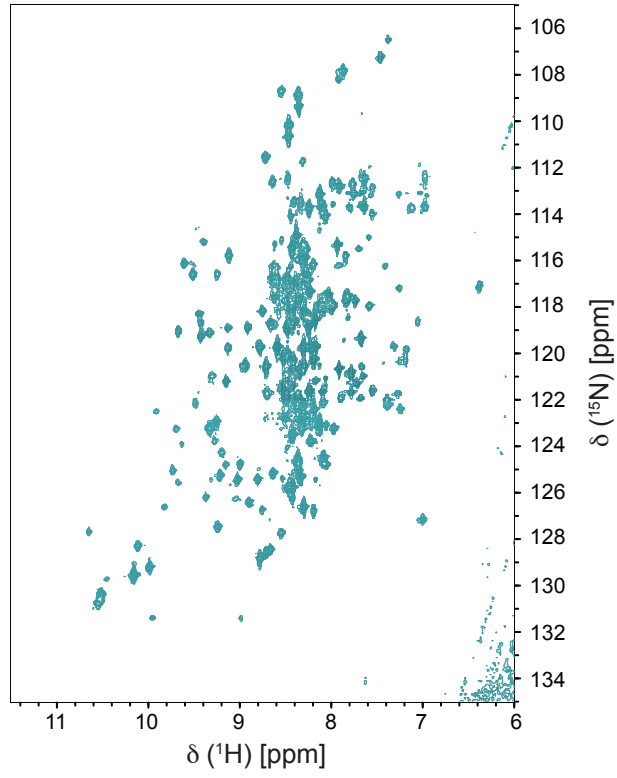

**B**  $^{15}\text{N}^{13}\text{C}$ -IF4E-1/Leish4E-IP1<sub>1-52</sub>

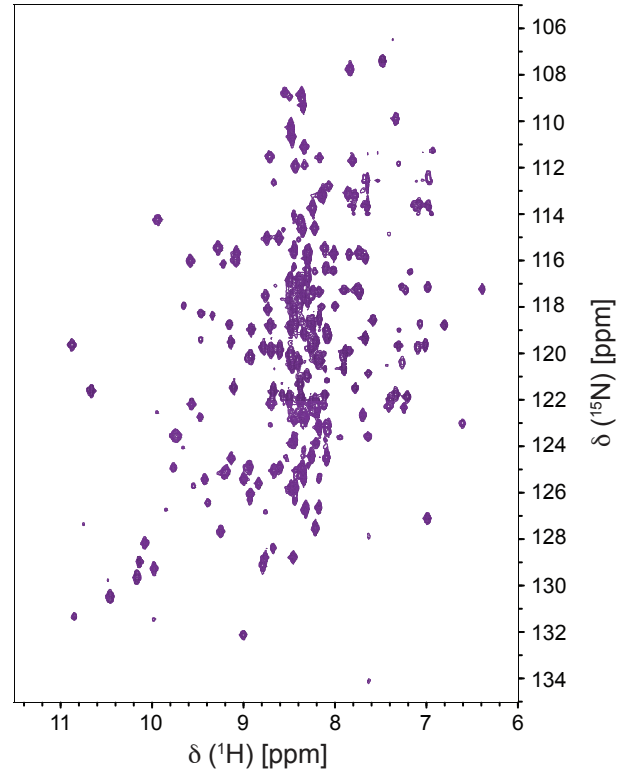

**Figure S2. NMR spectroscopy of LeishIF4E-1 bound to a fragment of Leish4E-IP1, Related to Figure 1 and Figure 3**

**(A)**  $^{15}\text{N}$ - $^1\text{H}$ -TROSY-HSQC spectrum of  $^{15}\text{N}^{13}\text{C}$ -LeishIF4E-1 acquired on a 600 MHz spectrometer.

**(B)** As described in (A), but where  $^{15}\text{N}^{13}\text{C}$ -LeishIF4E-1 is bound to unlabeled Leish4E-IP1<sub>1-52</sub> in an equimolar ratio.

# Figure S3

**A**

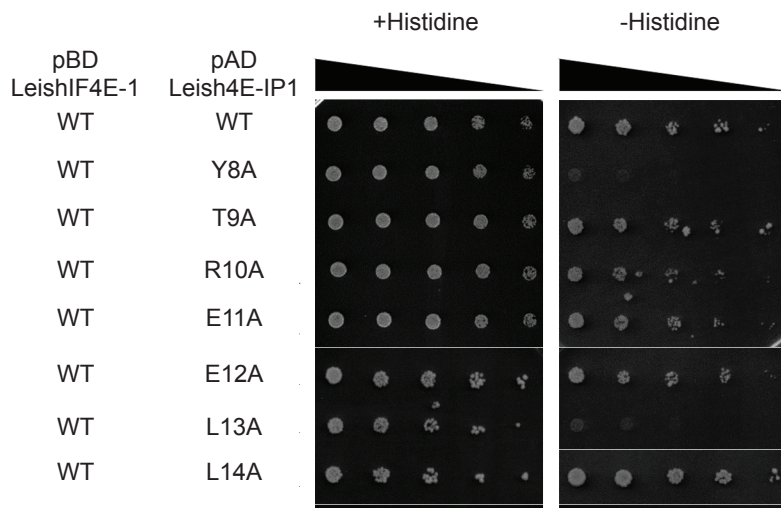

**B**

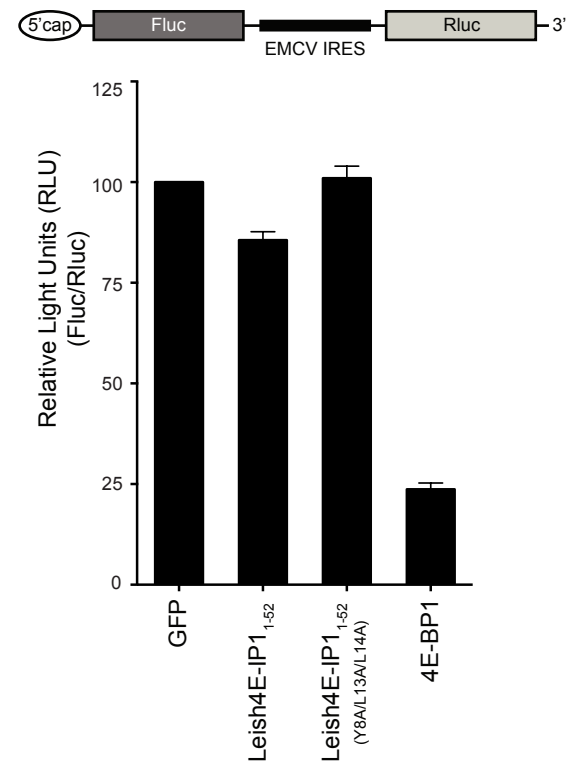



**Figure S3. Effect of Leish4E-IP1 on mammalian translation, Related to Figure 2**

**(A)** Yeast two-hybrid assay probing the Leish(IF4E-1/4E-IP1) interaction upon mutations in the consensus binding motif [ $^8Y(X)_4L\Phi^{14}$ ]. LeishIF4E-1 was fused to the GAL4-binding domain vector (pBD) while Leish4E-IP1 was fused to the GAL4 activation domain vector (pAD). The yeast strain YRG-2 was co-transformed with specific pAD and pBD constructs.

**(B)** Upper panel: Diagram representing a dual-luciferase reporter system where an IRES (EMCV) is inserted between genes encoding the Firefly (Fluc) and the Renilla (Rluc) luciferase. Lower panel: Luciferase assay in which HEK293T cells were co-transfected with the dual luciferase reporter shown in the upper panel and with the plasmids encoding GFP, Leish4E-IP1<sub>1-52</sub>-GFP, mutant Leish4E-IP1<sub>1-52</sub>Y8A/L13A/L14A-GFP or with 4E-BP1-GFP. The results are presented as a percentage value when compared to the 100% value assigned to the GFP construct. The values are the means of at least three independent experiments, with bars representing the standard error on the means.

Figure S4

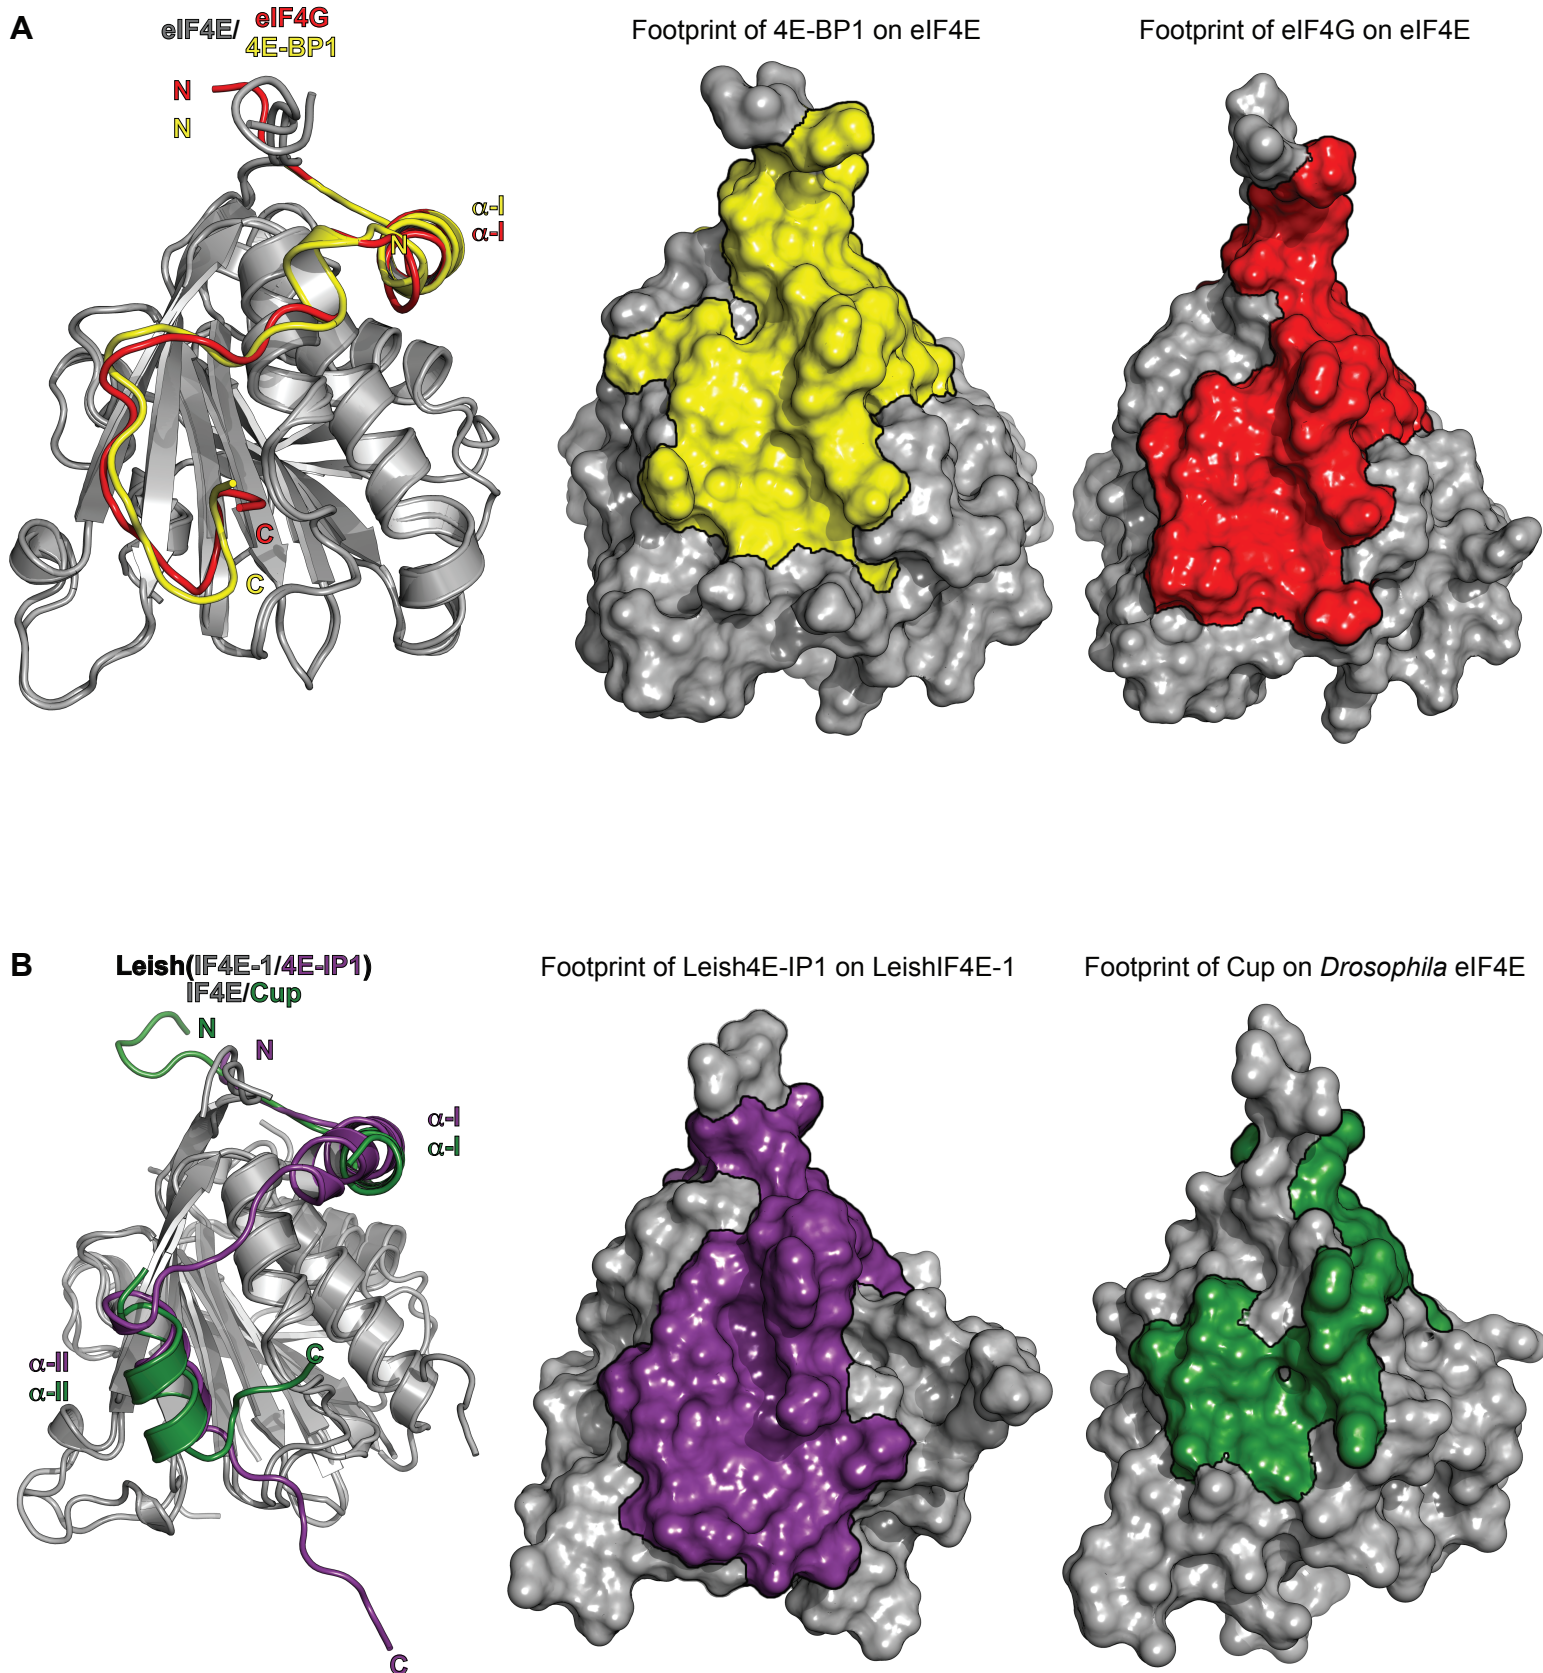

**Figure S4. Footprint analysis of the cap-binding proteins on IF4E, related to Figure 3**

**(A)** Left panel: Ribbon diagram of an overlay of eIF4E/eIF4G complex with eIF4E/4E-BP1, centered on helix  $\alpha$ -II. eIF4E is colored in gray in both complexes while 4E-BP1 is represented in yellow (PDB ID: 5BXV) and eIF4G is shown in red (PDB ID: 5T46). The C and N termini are indicated for both proteins. The footprint analysis showed in the middle panel (4E-BP1), and the right panel (eIF4G) are colored accordingly and highlight interacting located within 4 Å to eIF4E.

**(B)** Left panel: As described in (A), except showing the binding interface of Leish4E-IP1 (purple, PDB ID: 5WB5) on LeishIF4E-1 (gray) from *Leishmania major* and Cup (green, PDB ID: 4AXG) on IF4E (gray) from *Drosophila melanogaster*. The footprint of Cup on IF4E is incomplete since the linker portion between helix  $\alpha$ -I and helix  $\alpha$ -II is disordered in the crystal structure.

**Table S1: Data collection and refinement statistics (molecular replacement), Related to Figure 1 and 2**

---

| <b>Leish(IF4E-1<sub>12-210</sub>/4E-IP<sub>14-43</sub>) complex</b> |                                   |
|---------------------------------------------------------------------|-----------------------------------|
| <b>Data collection</b>                                              |                                   |
| Space group                                                         | <i>P6<sub>2</sub>22</i>           |
| Cell dimensions                                                     |                                   |
| <i>a, b, c</i> (Å)                                                  | 68.22 68.22 220.20                |
| $\alpha, \beta, \gamma$ (°)                                         | 90 90 120                         |
| Resolution (Å)                                                      | 36.7 - 2.7 (2.796 - 2.700)*       |
| R <sub>meas</sub>                                                   | 13.4 (47.7)                       |
| CC1/2                                                               | 99.90                             |
| Average <i>I</i> / $\sigma$                                         | 37.1 (14.68)*                     |
| Completeness (%)                                                    | 99.77 (100)*                      |
| Number of reflections observed                                      | 584551                            |
| Number of unique reflections                                        | 9019                              |
| <b>Refinement</b>                                                   |                                   |
| Resolution (Å)                                                      | 36.7 - 2.7                        |
| No. Reflections                                                     | 9013 (856)*                       |
| R <sub>work</sub> /R <sub>free</sub>                                | 0.2396 (0.2894)*/0.2816 (0.3082)* |
| No. of atoms                                                        | 1678                              |
| Protein                                                             | 1650                              |
| Ligand/ions                                                         | 7                                 |
| Water                                                               | 21                                |
| <i>B</i> -factors (Å <sup>2</sup> )                                 |                                   |
| Protein                                                             | 60.19                             |
| Ligand/ions                                                         | 60.22                             |
| Solvent                                                             | 37.4                              |
| R.m.s. deviations                                                   |                                   |
| Bond lengths (Å)                                                    | 0.003                             |
| Bond angles (°)                                                     | 0.49                              |
| Ramachandran favored (%)                                            | 97.97                             |
| Ramachandran allowed (%)                                            | 2.03                              |
| Ramachandran outliers (%)                                           | 0                                 |
| Rotamer outliers (%)                                                | 0                                 |
| Clashscore                                                          | 3.02                              |
| PDB ID                                                              | 5WB5                              |

---

Complete datasets of five crystals were collected and scaled together to generate the Leish(IF4E-1/4E-IP<sub>1-52</sub>) model. \*Values in parentheses are for the highest-resolution shell.

## REFERENCES

1. Longo,P.A., Kavran,J.M., Kim,M.-S. and Leahy,D.J. (2013) Transient Mammalian Cell Transfection with Polyethylenimine (PEI). In *Laboratory Methods in Enzymology: DNA*, Methods in Enzymology. Elsevier, Vol. 529, pp. 227–240.
2. Sievers,F., Wilm,A., Dineen,D., Gibson,T.J., Karplus,K., Li,W., Lopez,R., McWilliam,H., Remmert,M., Söding,J., *et al.* (2011) Fast, scalable generation of high-quality protein multiple sequence alignments using Clustal Omega. *Mol. Syst. Biol.*, **7**, 539–539.
3. Goujon,M., McWilliam,H., Li,W., Valentin,F., Squizzato,S., Paern,J. and Lopez,R. (2010) A new bioinformatics analysis tools framework at EMBL-EBI. *Nucleic Acids Res.*, **38**, W695–9.
4. Robert,X. and Gouet,P. (2014) Deciphering key features in protein structures with the new ENDscript server. *Nucleic Acids Res.*, **42**, W320–4.
